# Supplementary material for: Synaptotagmin 4 supports spontaneous axon regeneration after spinal cord injury
Source: Research Square preprint supplement (doi:10.21203/rs.3.rs-1991926/v1), 2022-09-21
Supplement: Supplementary file 1 [file 699570955414e3eedacea13d.xlsx]

## Sheet: Sheet1
Table 1	Neurite outgrowth assay
	Neurite length (µm)
Target gene	Trial #1	Trial #2
Control	50.9658	51.6326
Islr2	53.6602	46.5475
Nos1	46.6889	47.8017
Magel2	59.7471	51.9205
Hcn4	48.2704	47.1976
Grm2	52.9773	48.0913
Bhlhe22	39.4156	49.8601
Tubb3	48.6126	44.297
Syt4	42.383	43.6576
Calb2	55.6214	44.8281
Chrm3	42.4586	47.2825
Gabrg2	46.959	48.6373
Atp1a3	52.3816	45.4734
Gad1	49.0399	42.7962
Hcn1	50.7555	42.5791
Gria1	52.7657	43.3552
Hecw1	46.4838	45.5448
Cntnap2	47.204	46.361
Cacna1a	47.477	46.0608
Slc12a5	54.0812	44.6921
Grin1	54.8383	41.4796
